## Correction

# Correction: Normal Thoracic Radiographic Appearance of the Cynomolgus Monkey (*Macaca fascicularis*)

**The PLOS ONE Staff**

There is an error in the affiliation for the authors. The correct author affiliation is “the First Affiliated Hospital of Chongqing Medical University.”

**Reference**

1. Xie L, Zhou Q, Liu S, Wu Q, Ji Y, et al. (2014) Normal Thoracic Radiographic Appearance of the Cynomolgus Monkey (*Macaca fascicularis*). PLoS ONE 9(1): e84599. doi:10.1371/journal.pone.0084599

---

**Citation:** The PLOS ONE Staff (2014) Correction: Normal Thoracic Radiographic Appearance of the Cynomolgus Monkey (*Macaca fascicularis*). PLoS ONE 9(3): e93028. doi:10.1371/journal.pone.0093028

**Published:** March 14, 2014

**Copyright:** © 2014 The PLOS ONE Staff. This is an open-access article distributed under the terms of the Creative Commons Attribution License, which permits unrestricted use, distribution, and reproduction in any medium, provided the original author and source are credited.
